# Supplementary material for: Vascular Closure Devices versus Manual Compression in Cardiac Interventional Procedures: Systematic Review and Meta-Analysis
Source: Hindawi journal article supplement (doi:10.1155/2022/8569188), 2022-09-09

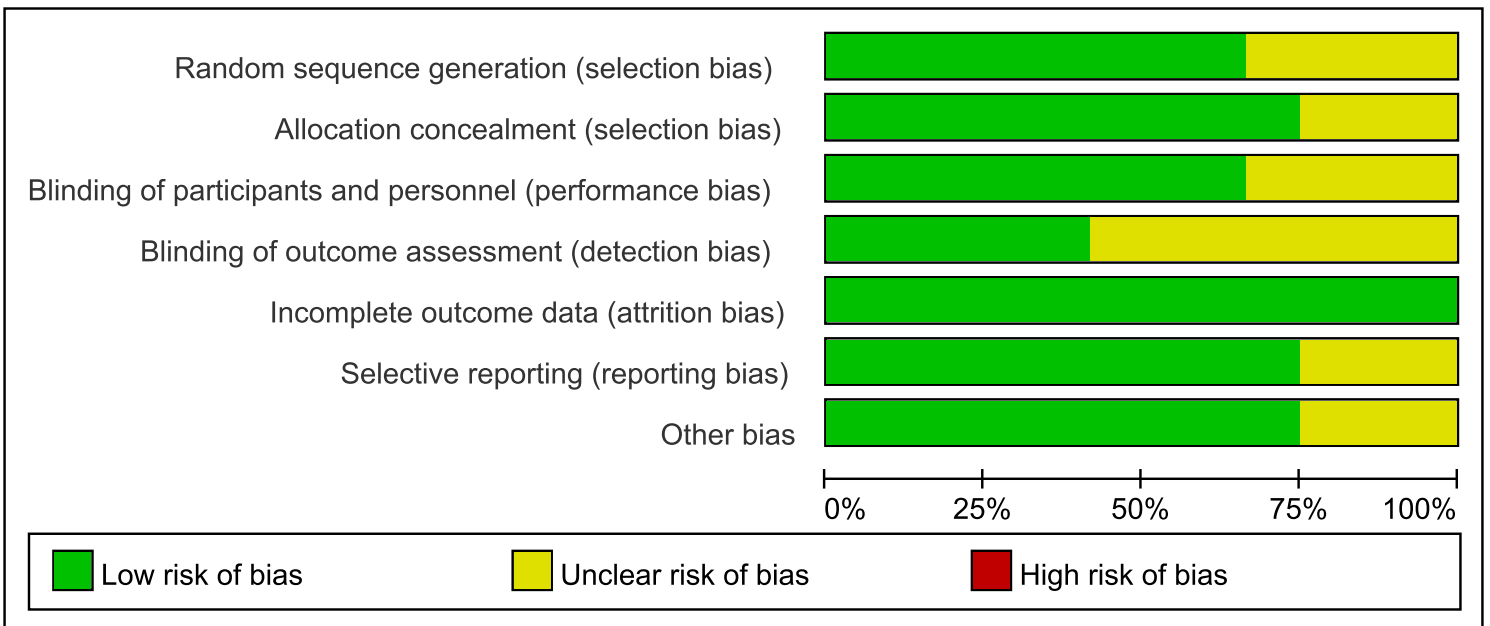

Supplement: f1 [file 8569188.f1.pdf]
