# Supplementary material for: Vascular Closure Devices versus Manual Compression in Cardiac Interventional Procedures: Systematic Review and Meta-Analysis
Source: Hindawi journal article supplement (doi:10.1155/2022/8569188), 2022-09-09
Supplement: f2 [file 8569188.f2.pdf]

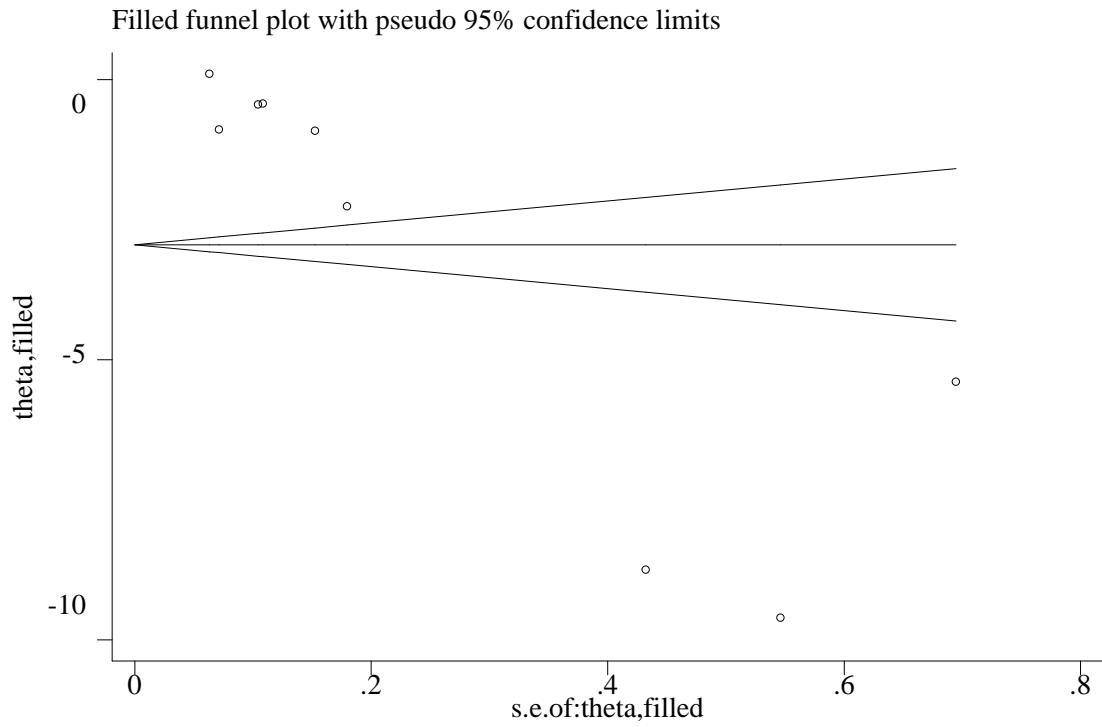

Trimming estimator: Linear  
 Meta-analysis type: Random-effects model  
 iteration estimate Tn to trim different  
 1 -2.947 24 0 45  
 2 -2.947 24 0 0  
 Note: no trimming performed; data unchanged
